# Supplementary material
Source: HighWire-hosted journal article supplement (https://jitc.bmj.com/content/8/1/e000617)
Supplement: inline-supplementary-material-3 [file inline-supplementary-material-3.xlsx]

## Sheet: 5.3.All_Pathways_High_and_Low
Supplementary Table 2: Pan-cancer survival analysis stratified by binary classification based on enrichment of selected oncogenic pathway signatures. HR, hazard ratio for death.
Oncogenic_Pathway	p_value_High	HR_High	CI_lower_High	CI_upper_High	p_value_Low	HR_Low	CI_lower_Low	CI_upper_Low	score_contribution	t.test.fdr.pvalue.Enabled.vs.Disabled
[HM] Angiogenesis	0.0151605	1.19	1.03	1.37	0.000583286	1.34	1.14	1.59	NA	0.0426249
[HM] Hypoxia	0.0434901	1.15	1	1.33	4.69243e-05	1.43	1.2	1.7	NA	4.00098e-186
[HM] KRAS signaling up	5.80725e-06	1.4	1.21	1.61	0.000432258	1.4	1.16	1.7	NA	1.22977e-69
[HM] Mitotic spindle	0.00075894	1.26	1.1	1.44	0.037621	1.21	1.01	1.44	NA	1.07595e-106
[HM] mTORC1 signaling	0.000342909	1.28	1.12	1.47	0.000587349	1.37	1.15	1.65	NA	9.29624e-127
[HM] Myc targets	0.00880862	1.2	1.05	1.38	0.00457527	1.28	1.08	1.53	NA	3.60777e-24
[HM] Oxidative phosphorylation	0.0419895	1.17	1.01	1.36	0.00623444	1.24	1.06	1.44	NA	1.3256e-261
[HM] p53 pathway	0.0323663	1.17	1.01	1.35	0.000176493	1.38	1.16	1.63	NA	4.40285e-90
[HM] DNA repair	2.48897e-05	1.37	1.18	1.58	0.551731	1.05	0.9	1.23	enabling	6.61675e-31
[HM] E2F targets	3.197e-10	1.53	1.34	1.75	0.354086	1.09	0.91	1.31	enabling	2.66512e-281
[HM] G2M checkpoint	1.24016e-10	1.54	1.35	1.76	0.368238	1.09	0.9	1.31	enabling	1.49217e-237
[IPA] Mismatch Repair in Eukaryotes	6.39321e-06	1.37	1.2	1.58	0.311865	1.09	0.92	1.29	enabling	5.67503e-199
[LM] Proliferation	1.98761e-10	1.55	1.36	1.78	0.703483	1.03	0.87	1.23	enabling	0
[HM] Apoptosis	0.115965	1.12	0.97	1.3	2.14422e-08	1.78	1.46	2.18	disabling	6.50518e-38
[HM] Estrogen response	0.154023	1.13	0.96	1.32	0.000911494	1.27	1.1	1.47	disabling	8.78793e-42
[HM] Glycolysis	0.0808616	1.13	0.99	1.3	0.000684591	1.35	1.13	1.6	disabling	6.75491e-37
[HM] Hedgehog signaling	0.364206	1.07	0.93	1.23	0.000368848	1.34	1.14	1.57	disabling	0
[HM] KRAS signaling down	0.123094	1.14	0.97	1.34	0.000812379	1.27	1.11	1.47	disabling	6.95303e-104
[HM] Notch signaling	0.785356	1.02	0.88	1.18	0.000116324	1.37	1.17	1.6	disabling	0
[HM] PI3K Akt mTOR signaling	0.975613	1	0.87	1.15	2.75917e-08	1.66	1.39	1.98	disabling	0
[HM] Reactive oxigen species pathway	0.31537	1.08	0.93	1.25	0.000147212	1.37	1.16	1.6	disabling	5.91603e-190
[HM] TGF beta signaling	0.500969	1.05	0.91	1.21	2.44008e-05	1.42	1.21	1.67	disabling	2.46532e-250
[HM] UV response down	0.524574	0.953	0.82	1.11	5.83686e-08	1.54	1.32	1.8	disabling	0
[HM] UV response up	0.137954	1.11	0.97	1.27	3.29997e-05	1.44	1.21	1.72	disabling	0
[HM] Wnt beta catenin signaling	0.46323	1.06	0.91	1.23	0.000145971	1.35	1.16	1.58	disabling	6.38207e-269
[IPA] AMPK Signaling	0.739147	1.03	0.88	1.2	8.99862e-07	1.46	1.25	1.69	disabling	0
[IPA] EGF Signaling	0.503347	0.95	0.82	1.1	6.09276e-08	1.53	1.31	1.78	disabling	0
[IPA] ErbB Signaling	0.570425	0.958	0.83	1.11	1.09633e-07	1.53	1.31	1.79	disabling	0
[IPA] ErbB2 ErbB3 Signaling	0.858415	1.01	0.87	1.18	7.45154e-06	1.45	1.23	1.7	disabling	0
[IPA] ERK MAPK Signaling	0.484208	0.949	0.82	1.1	4.36643e-08	1.56	1.33	1.83	disabling	0
[IPA] ERK5 Signaling	0.984885	0.999	0.86	1.15	2.28668e-06	1.47	1.25	1.72	disabling	0
[IPA] Estrogen Dependent Breast Cancer Signaling	0.533563	0.952	0.81	1.11	5.63468e-07	1.47	1.26	1.71	disabling	0
[IPA] HER 2 Signaling in Breast Cancer	0.498377	0.951	0.82	1.1	1.34192e-08	1.62	1.37	1.91	disabling	0
[IPA] HMGB1 Signaling	0.897438	1.01	0.87	1.17	1.13302e-07	1.61	1.35	1.92	disabling	0
[IPA] mTOR Signaling	0.314514	0.927	0.8	1.07	2.89926e-09	1.61	1.37	1.88	disabling	0
[IPA] Myc Mediated Apoptosis Signaling	0.471418	0.946	0.81	1.1	1.00861e-07	1.57	1.33	1.85	disabling	0
[IPA] PI3K AKT Signaling	0.485709	0.949	0.82	1.1	3.49542e-08	1.57	1.34	1.85	disabling	0
[IPA] PTEN Signaling	0.186015	0.903	0.78	1.05	1.71198e-09	1.61	1.38	1.87	disabling	0
[IPA] Telomere Extension by Telomerase	0.471072	1.06	0.91	1.23	1.39266e-05	1.4	1.2	1.63	disabling	0
[IPA] UVA Induced MAPK Signaling	0.353599	0.931	0.8	1.08	7.26025e-08	1.55	1.32	1.81	disabling	0
[IPA] UVB Induced MAPK Signaling	0.607307	0.961	0.83	1.12	4.12604e-07	1.49	1.27	1.73	disabling	0
[IPA] UVC Induced MAPK Signaling	0.657692	0.967	0.83	1.12	1.38311e-07	1.52	1.3	1.78	disabling	0
[IPA] VEGF Signaling	0.271346	0.921	0.79	1.07	3.25036e-09	1.62	1.38	1.9	disabling	0
[TBI] Barrier genes	0.0907336	1.14	0.98	1.33	0.00309051	1.25	1.08	1.45	disabling	6.53614e-207
[TBI] MAPK up genes	0.415776	0.934	0.79	1.1	5.83822e-11	1.6	1.39	1.84	disabling	0
[TBI] Phopholipase	0.0741378	1.15	0.99	1.34	0.00337207	1.25	1.08	1.46	disabling	0
[TPW] Hypoxia/Adenosine Immune Cell Suppression	0.754556	1.02	0.88	1.18	3.58629e-07	1.54	1.3	1.82	disabling	5.68613e-198
[TPW] SHC1/pSTAT3 Signature	0.0537813	1.15	1	1.33	1.17287e-06	1.55	1.3	1.85	disabling	2.13614e-61
