# Supplementary material
Source: HighWire-hosted journal article supplement (https://jitc.bmj.com/content/8/1/e000617)
Supplement: inline-supplementary-material-4 [file inline-supplementary-material-4.xlsx]

## Sheet: Sheet1
Supplementary Table 3: Association of ICR with OS across 31 cancer types with ICR as a categorical variable ICR Low versus ICR High (first and second column; yellow), and ICR as continuous variable (third and fourth column; blue). Number of deaths for each cancer type is indicated. HR, hazard ratio for death.
Cancer type	OS: ICR Low vs. ICR High		OS: ICR score continuous
	HR (HR>1 = better survival in ICR High)	p-value	HR HR (HR>1 = better survival in tumor with lower ICR score)	p-value	OS Events
ACC	1.64	0.50401	0.749825	0.11	27
BLCA	1.4	0.0573146	0.927267	0.061	178
BRCA	3.01	0.0016305	0.888482	0.033	138
CESC	1.53	0.249012	0.838119	0.022	70
CHOL	1.67	0.451099	0.848234	0.37	18
COAD	1.18	0.602804	0.923158	0.46	67
ESCA	0.929	0.873282	1.07585	0.35	77
GBM	0.903	0.675145	1.06975	0.51	121
HNSC	1.43	0.0949055	0.892451	0.014	211
KICH	1.51	0.57507	0.714207	0.44	9
KIRC	0.621	0.0273369	1.14734	0.051	169
KIRP	0.745	0.476953	1.42999	0.0048	41
LGG	0.353	3.29002e-05	1.55851	3.6e-08	117
LIHC	1.77	0.0482849	0.796072	0.01	130
LUAD	0.994	0.978174	0.943364	0.36	179
LUSC	1.22	0.503381	0.965224	0.52	198
MESO	0.856	0.700228	0.918136	0.37	73
OV	1.24	0.356138	0.932421	0.15	181
PAAD	0.542	0.0378925	1.07686	0.5	86
PCPG	963000000	0.999349	0.6183	0.42	5
PRAD	0.651	0.637981	0.753386	0.49	10
READ	1.2	0.798794	1.02126	0.94	14
SARC	1.95	0.0643254	0.847241	0.0099	96
SKCM	2.89	1.19542e-05	0.811659	1.6e-08	187
STAD	1.41	0.099357	0.959095	0.47	149
TGCT	2.72e-09	0.999141	1.2739	0.44	3
THCA	3.25	0.135652	0.608097	0.041	16
THYM	6.14e-10	0.99907	2.68579	0.0026	9
UCEC	2.25	0.0946383	0.793199	0.067	32
UCS	0.969	0.945928	0.971002	0.82	35
UVM	0.0567	0.000221141	1.55281	4e-05	23
